# Supplementary material for: Spatiotemporal variations in length-weight relationship, growth pattern and condition factor of Periophthalmus variabilis Eggert, 1935 in Vietnamese Mekong Delta
Source: PeerJ. 2022 Jan 11;10:e12798. doi: 10.7717/peerj.12798 (PMC8759381; doi:10.7717/peerj.12798)
Supplement: Supplemental Information 1 [file peerj-10-12798-s001.xlsx]

## Sheet: Sheet1
No.	Fish weight	Fish total length	Gender (0: Female and 1: Male)	Fish size (1: Immature fish and 2: Mature fish)	Season (1: Dry; 2: Wet)	Site	Month (4/2020-3/2021)
1	3.92	7.1	0	2	1	DHTV	4
2	3.15	6.8	0	2	1	DHTV	4
3	3.25	6.5	1	2	1	DHTV	4
4	3.13	6.5	0	2	1	DHTV	4
5	2.72	6.4	0	2	1	DHTV	4
6	2.28	5.9	0	2	1	DHTV	4
7	1.97	5.8	1	2	1	DHTV	4
8	2.77	6.6	1	2	1	DHTV	4
9	2.82	6.4	1	2	1	DHTV	4
10	2.78	6.6	1	2	1	DHTV	4
11	2.81	6.4	1	2	1	DHTV	4
12	2.72	6.6	1	2	1	DHTV	4
13	1.97	5.6	1	1	1	DHTV	4
14	2.7	6.4	1	2	1	DHTV	4
15	4.66	7.1	0	2	1	DHTV	4
16	3.86	7.2	1	2	1	DHTV	4
17	3.06	6.7	1	2	1	DHTV	4
18	3.74	7.2	1	2	1	DHTV	4
19	4.12	7.3	1	2	1	DHTV	5
20	2.95	6.6	1	2	1	DHTV	5
21	3.35	6.6	0	2	1	DHTV	5
22	2.93	6.3	0	2	1	DHTV	5
23	2.82	6.5	0	2	1	DHTV	5
24	2.38	6	0	2	1	DHTV	5
25	2.07	5.9	0	2	1	DHTV	5
26	2.57	6.4	0	2	1	DHTV	5
27	2.62	6.2	1	2	1	DHTV	5
28	2.58	6.4	0	2	1	DHTV	5
29	2.61	6.2	0	2	1	DHTV	5
30	2.52	6.4	1	2	1	DHTV	5
31	2.07	5.7	1	1	1	DHTV	5
32	2.5	6.2	1	2	1	DHTV	5
33	4.76	7.2	0	2	2	DHTV	6
34	3.96	7.3	0	2	2	DHTV	6
35	3.16	6.8	0	2	2	DHTV	6
36	3.54	7	0	2	2	DHTV	6
37	3.15	6.8	0	2	2	DHTV	6
38	3.55	7.7	0	2	2	DHTV	6
39	3.32	6.8	0	2	2	DHTV	6
40	3.13	6.6	0	2	2	DHTV	6
41	3.08	6.6	0	2	2	DHTV	6
42	2.55	6.5	0	2	2	DHTV	6
43	2.54	6.3	1	2	2	DHTV	6
44	2.7	6.3	1	2	2	DHTV	6
45	3.4	6.6	0	2	2	DHTV	6
46	2.87	6.7	0	2	2	DHTV	6
47	2.79	6.5	0	2	2	DHTV	6
48	2.57	6.4	1	2	2	DHTV	6
49	2.24	6.3	1	2	2	DHTV	6
50	2.12	6	0	2	2	DHTV	6
51	2.51	6.2	1	2	2	DHTV	6
52	0.9	4.7	1	1	2	DHTV	6
53	0.82	4.5	1	1	2	DHTV	6
54	0.84	4.6	1	1	2	DHTV	6
55	1.07	5	1	1	2	DHTV	6
56	0.99	4.8	1	1	2	DHTV	6
57	0.82	4.5	1	1	2	DHTV	6
58	0.51	3.9	0	1	2	DHTV	6
59	0.7	4.3	1	1	2	DHTV	6
60	0.64	4.4	1	1	2	DHTV	7
61	1.27	5.2	1	1	2	DHTV	7
62	0.89	4.7	1	1	2	DHTV	7
63	1.02	4.7	1	1	2	DHTV	7
64	0.41	3.8	0	1	2	DHTV	7
65	0.6	4.2	1	1	2	DHTV	7
66	3.79	7.1	0	2	2	DHTV	7
67	4.07	7.1	0	2	2	DHTV	7
68	1.95	5.9	0	2	2	DHTV	7
69	2.3	6.8	1	2	2	DHTV	7
70	2.5	6.3	1	2	2	DHTV	7
71	2.69	6.5	1	2	2	DHTV	7
72	2.99	6.7	1	2	2	DHTV	7
73	4.2	7.6	0	2	2	DHTV	7
74	3.89	7.2	0	2	2	DHTV	8
75	3.87	6.9	0	2	2	DHTV	8
76	1.75	5.7	0	2	2	DHTV	8
77	2.1	6.6	1	2	2	DHTV	8
78	2.3	6.1	1	2	2	DHTV	8
79	2.49	6.3	1	2	2	DHTV	8
80	3.09	6.8	1	2	2	DHTV	8
81	4	7.4	0	2	2	DHTV	8
82	2.35	6.2	0	2	2	DHTV	8
83	3.59	7.1	0	2	2	DHTV	8
84	1.3	5.4	1	1	2	DHTV	8
85	2.9	6.6	1	2	2	DHTV	8
86	3.22	7.2	0	2	2	DHTV	9
87	1.21	4.6	1	1	2	DHTV	9
88	2.78	5.2	0	2	2	DHTV	9
89	1.41	5.4	1	1	2	DHTV	9
90	2.23	6.3	0	2	2	DHTV	9
91	4.31	7.4	0	2	2	DHTV	9
92	2.86	6.3	0	2	2	DHTV	9
93	2.26	6.4	0	2	2	DHTV	9
94	3.85	7.2	0	2	2	DHTV	9
95	2.01	5.9	1	2	2	DHTV	9
96	2.53	6.5	1	2	2	DHTV	9
97	2.7	6.6	1	2	2	DHTV	9
98	2.42	6.5	0	2	2	DHTV	9
99	2.29	5.9	1	2	2	DHTV	9
100	0.82	4.3	0	1	2	DHTV	10
101	1.13	4.9	1	1	2	DHTV	10
102	2.26	6.1	1	2	2	DHTV	10
103	2.87	6.6	0	2	2	DHTV	10
104	2.58	6.5	1	2	2	DHTV	10
105	3.69	7	0	2	2	DHTV	10
106	4.07	7.1	0	2	2	DHTV	10
107	1.65	5.6	0	2	2	DHTV	10
108	2.3	6.8	1	2	2	DHTV	10
109	2.2	6	0	2	2	DHTV	10
110	2.39	6.2	0	2	2	DHTV	10
111	2.99	6.7	0	2	2	DHTV	10
112	4.2	7.6	0	2	2	DHTV	10
113	2.55	6.4	0	2	2	DHTV	11
114	3.79	7.3	1	2	2	DHTV	11
115	1.5	5.6	1	1	2	DHTV	11
116	3.1	6.8	1	2	2	DHTV	11
117	3.12	7.1	0	2	2	DHTV	11
118	1.41	4.8	0	1	2	DHTV	11
119	2.68	5.1	0	1	2	DHTV	11
120	1.31	5.3	1	1	2	DHTV	11
121	2.13	6.2	0	2	2	DHTV	11
122	4.51	7.6	1	2	2	DHTV	11
123	3.06	6.5	0	2	2	DHTV	11
124	2.46	6.6	1	2	2	DHTV	11
125	4.05	7.4	1	2	2	DHTV	12
126	1.91	5.8	1	2	2	DHTV	12
127	2.73	6.7	0	2	2	DHTV	12
128	2.6	6.5	1	2	2	DHTV	12
129	2.32	6.4	0	2	2	DHTV	12
130	2.49	6.1	1	2	2	DHTV	12
131	1.02	4.5	1	1	2	DHTV	12
132	1.33	5.1	1	1	2	DHTV	12
133	2.46	6.3	1	2	2	DHTV	12
134	2.77	6.5	0	2	2	DHTV	12
135	2.78	6.7	1	2	2	DHTV	12
136	2.57	6.4	0	2	1	DHTV	1
137	4.18	7.5	0	2	1	DHTV	1
138	3.17	6.9	0	2	1	DHTV	1
139	4.21	7.5	0	2	1	DHTV	1
140	3.83	7.2	0	2	1	DHTV	1
141	3.07	6.8	0	2	1	DHTV	1
142	3.9	7.7	0	2	1	DHTV	1
143	3.45	7.1	0	2	1	DHTV	1
144	3.07	6.8	0	2	1	DHTV	1
145	2.88	6.8	0	2	1	DHTV	1
146	3.12	7.2	0	2	1	DHTV	1
147	3.14	6.8	1	2	1	DHTV	1
148	4.47	7.8	0	2	1	DHTV	1
149	3.39	7	0	2	1	DHTV	1
150	3.27	7.4	0	2	1	DHTV	1
151	3.2	6.8	0	2	1	DHTV	1
152	4.21	7.7	0	2	1	DHTV	1
153	3.69	7.3	0	2	1	DHTV	1
154	1.92	6	1	2	1	DHTV	1
155	2.1	5.9	0	2	1	DHTV	1
156	2.43	6	0	2	1	DHTV	1
157	1.3	5.2	1	1	1	DHTV	1
158	2.09	6	0	2	1	DHTV	1
159	1.19	5.2	1	1	1	DHTV	1
160	1.22	5.1	0	1	1	DHTV	1
161	0.6	4.2	0	1	1	DHTV	1
162	2.37	6.2	0	2	1	DHTV	2
163	4.38	7.7	1	2	1	DHTV	2
164	3.07	6.8	1	2	1	DHTV	2
165	4.41	7.7	1	2	1	DHTV	2
166	3.73	7.1	1	2	1	DHTV	2
167	2.97	6.7	1	2	1	DHTV	2
168	3.8	7.6	1	2	1	DHTV	2
169	3.65	7.3	1	2	1	DHTV	2
170	3.27	7	1	2	1	DHTV	2
171	3.08	7	0	2	1	DHTV	2
172	3.32	7.4	0	2	1	DHTV	2
173	3.34	7	0	2	1	DHTV	2
174	4.37	7.7	0	2	1	DHTV	2
175	3.59	7.2	0	2	1	DHTV	2
176	3.17	7.3	0	2	1	DHTV	2
177	4.12	7.3	0	2	1	TDST	4
178	3.05	6.7	0	2	1	TDST	4
179	2.17	6	1	2	1	TDST	4
180	2.67	6.5	1	2	1	TDST	4
181	3.02	6.6	1	2	1	TDST	4
182	2.68	6.5	0	2	1	TDST	4
183	2.71	6.3	0	2	1	TDST	4
184	2.62	6.5	0	2	1	TDST	4
185	2.17	5.8	1	2	1	TDST	4
186	2.9	6.6	1	2	1	TDST	5
187	4.86	7.3	1	2	1	TDST	5
188	3.55	6.8	1	2	1	TDST	5
189	2.83	6.2	1	2	1	TDST	5
190	3.02	6.7	0	2	1	TDST	5
191	2.28	5.9	1	2	1	TDST	5
192	1.97	5.8	0	2	1	TDST	5
193	2.77	6.6	0	2	1	TDST	5
194	2.82	6.4	1	2	2	TDST	6
195	2.78	6.6	1	2	2	TDST	6
196	2.81	6.4	0	2	2	TDST	6
197	2.72	6.6	0	2	2	TDST	6
198	1.97	5.6	0	2	2	TDST	6
199	0.44	4.2	1	1	2	TDST	6
200	4.27	7.3	0	2	2	TDST	6
201	2.15	6.1	0	2	2	TDST	6
202	2.5	7	1	2	2	TDST	6
203	2.7	6.5	1	2	2	TDST	6
204	2.89	6.7	1	2	2	TDST	7
205	2.89	6.6	1	2	2	TDST	7
206	4	7.4	0	2	2	TDST	7
207	3.69	7	1	2	2	TDST	7
208	4.07	7.1	0	2	2	TDST	7
209	1.65	5.6	1	1	2	TDST	7
210	2.3	6.8	0	2	2	TDST	7
211	2.2	6	0	2	2	TDST	7
212	2.39	6.2	0	2	2	TDST	8
213	1.5	5.6	1	1	2	TDST	8
214	3.1	6.8	1	2	2	TDST	8
215	3.12	7.1	1	2	2	TDST	8
216	1.41	4.8	1	1	2	TDST	8
217	2.68	5.1	1	1	2	TDST	8
218	1.31	5.3	0	2	2	TDST	8
219	2.13	6.2	0	2	2	TDST	8
220	4.51	7.6	0	2	2	TDST	8
221	3.06	6.5	0	2	2	TDST	8
222	2.46	6.6	0	2	2	TDST	8
223	4.05	7.4	0	2	2	TDST	8
224	2.32	6.4	0	2	2	TDST	8
225	2.49	6.1	1	2	2	TDST	8
226	1.02	4.5	0	1	2	TDST	9
227	1.33	5.1	1	1	2	TDST	9
228	2.46	6.3	1	2	2	TDST	9
229	2.77	6.5	0	2	2	TDST	9
230	2.78	6.7	0	2	2	TDST	9
231	3.49	6.8	0	2	2	TDST	9
232	4.27	7.3	0	2	2	TDST	9
233	1.55	5.5	1	1	2	TDST	9
234	4.4	7.8	0	2	2	TDST	9
235	2.75	6.6	0	2	2	TDST	10
236	3.99	7.5	0	2	2	TDST	10
237	1.7	5.8	0	2	2	TDST	10
238	3.3	7	0	2	2	TDST	10
239	3.02	7	1	2	2	TDST	10
240	1.61	5	1	1	2	TDST	10
241	2.58	5	1	1	2	TDST	10
242	1.21	5.2	1	1	2	TDST	10
243	2.03	6.1	0	2	2	TDST	10
244	4.71	7.8	1	2	2	TDST	10
245	1.81	5.7	1	1	2	TDST	10
246	2.93	6.9	0	2	2	TDST	10
247	2.5	6.4	1	2	2	TDST	11
248	2.22	6.3	0	2	2	TDST	11
249	2.69	6.3	1	2	2	TDST	11
250	1.22	4.7	1	1	2	TDST	11
251	1.53	5.3	1	1	2	TDST	11
252	2.66	6.5	1	2	2	TDST	11
253	2.67	6.4	0	2	2	TDST	11
254	2.47	6.3	0	2	2	TDST	11
255	4.38	7.7	0	2	2	TDST	12
256	3.07	6.8	0	2	2	TDST	12
257	4.41	7.7	0	2	2	TDST	12
258	3.73	7.1	0	2	2	TDST	12
259	2.97	6.7	0	2	2	TDST	12
260	3.8	7.6	0	2	2	TDST	12
261	3.65	7.3	0	2	2	TDST	12
262	3.34	7	1	2	2	TDST	12
263	4.37	7.7	0	2	2	TDST	12
264	3.59	7.2	0	2	2	TDST	12
265	3.17	7.3	0	2	2	TDST	12
266	3.1	6.7	0	2	1	TDST	1
267	4.11	7.6	0	2	1	TDST	1
268	3.89	7.5	0	2	1	TDST	1
269	2.12	6.2	1	2	1	TDST	1
270	2.29	6.2	0	2	1	TDST	1
271	1.09	5.1	1	1	1	TDST	1
272	1.42	5.3	0	2	1	TDST	1
273	0.5	4.1	0	1	1	TDST	1
274	2.27	6.1	0	2	1	TDST	1
275	4.28	7.6	1	2	1	TDST	1
276	3.27	7	1	2	1	TDST	2
277	4.61	7.9	1	2	1	TDST	2
278	3.93	7.3	1	2	1	TDST	2
279	3.17	6.9	1	2	1	TDST	2
280	2.98	6.9	0	2	1	TDST	2
281	3.22	7.3	0	2	1	TDST	2
282	3.24	6.9	0	2	1	TDST	2
283	4.57	7.9	0	2	1	TDST	2
284	3.79	7.4	0	2	1	TDST	2
285	3.37	7.5	0	2	1	TDST	2
286	4.12	7.3	0	2	1	DHBL	4
287	3.35	7	0	2	1	DHBL	4
288	3.45	6.7	1	2	1	DHBL	4
289	3.33	6.7	0	2	1	DHBL	4
290	2.92	6.6	0	2	1	DHBL	4
291	2.48	6.1	0	2	1	DHBL	5
292	2.17	6	1	2	1	DHBL	5
293	2.97	6.8	1	2	1	DHBL	5
294	3.02	6.6	1	2	1	DHBL	5
295	2.98	6.8	1	2	1	DHBL	5
296	2.46	6.4	1	2	1	DHBL	5
297	1.9	6	1	2	2	DHBL	6
298	2.37	6.1	1	2	2	DHBL	6
299	1.91	6.1	1	2	2	DHBL	6
300	3.72	7.1	0	2	2	DHBL	6
301	1.92	5.9	1	2	2	DHBL	6
302	2.31	6.2	1	2	2	DHBL	7
303	1.34	6.2	1	2	2	DHBL	7
304	2.92	6.7	0	2	2	DHBL	7
305	3.75	7.4	0	2	2	DHBL	7
306	3.01	6.6	1	2	2	DHBL	7
307	2.92	6.8	1	2	2	DHBL	7
308	2.17	5.8	1	2	2	DHBL	7
309	2.9	6.6	1	2	2	DHBL	7
310	4.86	7.3	0	2	2	DHBL	7
311	4.06	7.4	1	2	2	DHBL	8
312	3.26	6.9	1	2	2	DHBL	8
313	3.94	7.4	1	2	2	DHBL	8
314	4.32	7.5	1	2	2	DHBL	8
315	3.15	6.8	1	2	2	DHBL	8
316	3.55	6.8	0	2	2	DHBL	8
317	3.13	6.5	0	2	2	DHBL	8
318	3.02	6.7	0	2	2	DHBL	8
319	2.58	6.2	0	2	2	DHBL	8
320	2.27	6.1	0	2	2	DHBL	8
321	2.77	6.6	0	2	2	DHBL	9
322	2.82	6.4	1	2	2	DHBL	9
323	2.78	6.6	0	2	2	DHBL	9
324	2.81	6.4	0	2	2	DHBL	9
325	2.72	6.6	1	2	2	DHBL	9
326	2.27	5.9	1	2	2	DHBL	9
327	2.7	6.4	1	2	2	DHBL	9
328	3.02	7	0	2	2	DHBL	10
329	1.01	4.4	1	1	2	DHBL	10
330	2.58	5	0	1	2	DHBL	10
331	1.21	5.2	1	1	2	DHBL	10
332	2.03	6.1	0	2	2	DHBL	10
333	4.11	7.2	0	2	2	DHBL	10
334	2.66	6.1	0	2	2	DHBL	11
335	2.06	6.2	0	2	2	DHBL	11
336	3.65	7	0	2	2	DHBL	11
337	1.81	5.7	1	1	2	DHBL	11
338	2.33	6.3	1	2	2	DHBL	11
339	2.5	6.4	1	2	2	DHBL	11
340	2.22	6.3	0	2	2	DHBL	11
341	2.09	5.7	1	1	2	DHBL	12
342	0.62	4.1	0	1	2	DHBL	12
343	0.93	4.7	1	1	2	DHBL	12
344	2.06	5.9	1	2	2	DHBL	12
345	2.67	6.4	0	2	2	DHBL	12
346	2.38	6.3	1	2	2	DHBL	12
347	3.12	6.6	0	2	2	DHBL	12
348	2.93	6.4	0	2	1	DHBL	1
349	2.88	6.4	0	2	1	DHBL	1
350	2.35	6.3	0	2	1	DHBL	1
351	2.34	6.1	1	2	1	DHBL	1
352	2.5	6.1	1	2	1	DHBL	1
353	3.2	6.4	0	2	1	DHBL	1
354	2.67	6.5	0	2	1	DHBL	1
355	2.59	6.3	0	2	1	DHBL	1
356	2.37	6.2	1	2	1	DHBL	1
357	2.04	6.1	1	2	1	DHBL	2
358	1.92	5.8	0	2	1	DHBL	2
359	2.31	6	1	2	1	DHBL	2
360	0.7	4.5	1	1	1	DHBL	2
361	0.62	4.3	1	1	1	DHBL	2
362	0.64	4.4	1	1	1	DHBL	2
363	0.87	4.8	1	1	1	DHBL	2
364	0.79	4.6	1	1	1	DHBL	2
365	0.62	4.3	1	1	1	DHBL	2
366	0.31	3.7	0	1	1	DHBL	2
367	3.22	7.1	0	2	1	DDCM	4
368	1	5.6	1	1	1	DDCM	4
369	1.52	5.8	0	2	1	DDCM	4
370	3.52	7.1	0	2	1	DDCM	5
371	1.47	5.6	1	1	1	DDCM	5
372	1.82	5.8	0	2	1	DDCM	5
373	1	5.6	1	1	1	DDCM	5
374	1.52	5.8	0	2	1	DDCM	5
375	2.24	6.3	1	2	2	DDCM	6
376	2.12	6	0	2	2	DDCM	6
377	2.51	6.2	1	2	2	DDCM	6
378	0.9	4.7	1	1	2	DDCM	6
379	0.82	4.5	1	1	2	DDCM	6
380	0.84	4.6	1	1	2	DDCM	6
381	1.07	5	1	1	2	DDCM	6
382	3.54	7	0	2	2	DDCM	7
383	3.15	6.8	0	2	2	DDCM	7
384	3.55	7.7	0	2	2	DDCM	7
385	3.32	6.8	1	2	2	DDCM	7
386	3.13	6.6	0	2	2	DDCM	7
387	3.08	6.6	0	2	2	DDCM	7
388	6.4	8.3	0	2	2	DDCM	8
389	2.79	6.6	1	2	2	DDCM	8
390	4.24	7.4	1	2	2	DDCM	8
391	4.63	7.7	0	2	2	DDCM	8
392	6.89	8.2	0	2	2	DDCM	8
393	1.95	5.9	0	2	2	DDCM	8
394	3.42	7.3	0	2	2	DDCM	9
395	1.2	5.8	1	2	2	DDCM	9
396	1.42	5.6	0	2	2	DDCM	9
397	3.32	7	0	2	2	DDCM	9
398	1.67	5.7	1	1	2	DDCM	9
399	1.72	5.6	0	2	2	DDCM	9
400	1.2	5.8	1	2	2	DDCM	9
401	1.42	5.6	0	2	2	DDCM	9
402	2.14	6.1	1	2	2	DDCM	9
403	2.32	6.2	0	2	2	DDCM	9
404	2.71	6.4	1	2	2	DDCM	9
405	1.1	4.9	1	1	2	DDCM	10
406	1.02	4.7	1	1	2	DDCM	10
407	1.04	4.8	1	1	2	DDCM	10
408	0.97	4.8	1	1	2	DDCM	10
409	3.44	6.8	0	2	2	DDCM	10
410	3.05	6.6	0	2	2	DDCM	10
411	3.45	7.5	0	2	2	DDCM	10
412	3.52	7	1	2	2	DDCM	10
413	2.93	6.5	0	2	2	DDCM	11
414	3.28	6.7	0	2	2	DDCM	11
415	6.3	8.2	0	2	2	DDCM	11
416	2.99	6.8	1	2	2	DDCM	11
417	4.14	7.3	1	2	2	DDCM	11
418	4.53	7.6	0	2	2	DDCM	11
419	6.79	8.1	0	2	2	DDCM	11
420	2.15	6.1	0	2	2	DDCM	11
421	1.67	5.8	1	2	2	DDCM	12
422	2.02	6	0	2	2	DDCM	12
423	1.2	5.8	1	2	2	DDCM	12
424	1.72	6	0	2	2	DDCM	12
425	2.44	6.5	1	2	2	DDCM	12
426	2.32	6.2	0	2	2	DDCM	12
427	2.71	6.4	1	2	2	DDCM	12
428	1.1	4.9	1	1	2	DDCM	12
429	1.02	4.7	1	1	2	DDCM	12
430	1.04	4.8	1	1	2	DDCM	12
431	1.27	5.2	1	1	2	DDCM	12
432	3.74	7.2	0	2	1	DDCM	1
433	3.35	7	0	2	1	DDCM	1
434	3.75	7.9	0	2	1	DDCM	1
435	3.52	7	1	2	1	DDCM	1
436	3.33	6.8	0	2	1	DDCM	1
437	3.28	6.8	0	2	1	DDCM	1
438	6.6	8.5	0	2	1	DDCM	1
439	2.99	6.8	1	2	1	DDCM	1
440	4.44	7.6	1	2	1	DDCM	1
441	4.83	7.9	0	2	1	DDCM	1
442	7.09	8.4	0	2	1	DDCM	1
443	2.15	6.1	0	2	1	DDCM	2
444	3.42	7.3	0	2	1	DDCM	2
445	1.2	5.8	1	2	1	DDCM	2
446	1.72	6	0	2	1	DDCM	2
447	3.72	7.2	0	2	1	DDCM	2
448	1.67	5.8	1	2	1	DDCM	2
449	2.02	6	0	2	1	DDCM	2
450	1.2	5.8	1	2	1	DDCM	2
451	1.72	6	0	2	1	DDCM	2
452	1.87	5.3	1	1	1	DHTV	3
453	2.63	6.1	1	2	1	DHTV	3
454	1.97	5.4	0	2	1	DHTV	3
455	2.44	5.9	0	2	1	DHTV	3
456	2.42	6	0	2	1	DHTV	3
457	2.41	5.8	1	2	1	DHTV	3
458	0.61	4	1	1	1	DHTV	3
459	1.21	4.8	1	1	1	DHTV	3
460	2.19	5.6	1	2	1	DHTV	3
461	2.37	5.8	1	2	1	DHTV	3
462	2.57	6.1	1	2	1	DHTV	3
463	2.3	6	0	2	1	DHTV	3
464	1.43	5.2	1	1	1	DHTV	3
465	2.95	6.3	1	2	1	DHTV	3
466	2.92	6.3	0	2	1	DHTV	3
467	3.71	7.1	0	2	1	DHTV	3
468	1.16	4.7	0	1	1	DHTV	3
469	0.57	3.9	0	1	1	DHTV	3
470	2.63	6.1	0	2	1	TDST	3
471	2.68	5.9	1	2	1	TDST	3
472	1.43	5.2	1	1	1	TDST	3
473	2.95	6.3	1	2	1	TDST	3
474	2.61	6.1	0	2	1	TDST	3
475	3.79	6.9	0	2	1	TDST	3
476	2.92	6.3	0	2	1	TDST	3
477	4.19	7.1	0	2	1	TDST	3
478	3.11	6.4	1	2	1	TDST	3
479	4.38	7.3	1	2	1	TDST	3
480	2.87	6.1	1	2	1	DHBL	3
481	2.83	6.3	1	2	1	DHBL	3
482	3.74	6.8	1	2	1	DHBL	3
483	4.1	6.9	1	2	1	DHBL	3
484	1.15	4.8	1	1	1	DHBL	3
485	1.93	5.6	0	2	1	DHBL	3
486	2.96	6.1	0	2	1	DHBL	3
487	2.78	5.9	0	2	1	DHBL	3
488	0.86	4.3	1	1	1	DDCM	3
489	0.78	4.1	1	1	1	DDCM	3
490	3.15	6.4	0	2	1	DDCM	3
491	1.59	5.2	1	1	1	DDCM	3
492	1.05	4.5	1	1	1	DDCM	3
493	0.97	4.3	1	1	1	DDCM	3
494	1.14	5.3	1	1	1	DDCM	3
495	1.63	5.5	0	2	1	DDCM	3
